# Supplementary material for: COVID-19 Lockdown and Changes of the Dietary Pattern and Physical Activity Habits in a Cohort of Patients with Type 2 Diabetes Mellitus
Source: MDPI journal article supplement (doi:10.3390/nu12082327), 2020-08-04
Supplement: s1 [file s1]

**Table S1.** Food intake frequencies to compare dietary patterns before and during COVID-19 lockdown, expressed by percentage of patients according to weekly or daily frequency of intake of each food group. *n*=72.

|                                                       | Patients (%) |        |
|-------------------------------------------------------|--------------|--------|
|                                                       | BEFORE       | DURING |
| <b>Fruit frequency of intake per day</b>              |              |        |
| 1 serving or less                                     | 55.7         | 51.4   |
| 2-4 servings                                          | 24.3         | 28,6   |
| 5 or more servings                                    | 20.,0        | 20,0   |
| <b>Meat, fish and egg frequency of intake per day</b> |              |        |
| 1 serving or less                                     | 20,0         | 20.0   |
| 2 servings                                            | 47.1         | 48.6   |
| 3 or more servings                                    | 32.9         | 3.,4   |
| <b>Cereal frequency of intake per day</b>             |              |        |
| 1 serving or less                                     | 48.6         | 48.6   |
| 2-4 servings                                          | 41.4         | 42.,9  |
| 5 or more servings                                    | 10.0         | 8.6    |
| <b>Nut frequency of intake per week</b>               |              |        |
| Never                                                 | 22.9         | 28.6   |
| 1-3 servings                                          | 44.,3        | 32.,9  |
| 4 or more servings                                    | 32.,9        | 38.6   |
| <b>Legumes frequency of intake per week</b>           |              |        |
| Never                                                 | 12.9         | 11.4   |
| 1-3 servings                                          | 81.4         | 78.,6  |
| 4 or more servings                                    | 5.7          | 10.,0  |
| <b>Sugar-sweetened beverage intake per week</b>       |              |        |
| Never                                                 | 57.1         | 57.,1  |
| 1-3 servings                                          | 21.4         | 21.,4  |
| 4 or more servings                                    | 21.4         | 21.4   |
